# Supplementary material
Source: Research Square preprint supplement (doi:10.21203/rs.3.rs-10050729/v1)
Supplement: Supplementary file 1 [file fed8b26c0ebc8eef975edb57.pdf]

# Shape-induced alignment and voltage-controlled switching in cholesteric droplets for smart film applications

**Anna P. Gardymova<sup>1,2\*</sup>, Oxana O. Prishchepa<sup>1</sup>, Vladimir Yu. Rudyak<sup>3</sup>,  
Vadim A. Barbashov<sup>4</sup>, Roman Yu. Kazantsev<sup>2</sup>**

*1. Kirensky Institute of Physics, Federal Research Center KSC SB RAS, Krasnoyarsk, Russia*

*2. Institute of Engineering Physics and Radio Electronics, Siberian Federal University, Krasnoyarsk, Russia*

*3. School of Physics and Astronomy, Tel-Aviv University, Tel Aviv 69978, Israel*

*4. Lebedev Physical Institute of RAS, Moscow, Russia*

*\*Corresponding author email address: gard@iph.krasn.ru*

**Figures S1 – S4** Step-by-step structure transformation in the oblate cholesteric droplet under increasing and decreasing the electric field.

**Movie S1** – The structure transformation in the oblate cholesteric E7-based droplet (cholesteric pitch  $p_0=8.2 \mu\text{m}$ , dielectric anisotropy  $\Delta\varepsilon > 0$ , droplet aspect ratio  $\delta \approx 0.2$ ) with  $N_0 = 3.0$ .

**Movie S2** – The structure transformation in the oblate cholesteric CYLC-45-based droplet (cholesteric pitch  $p_0=16.0 \mu\text{m}$ , dielectric anisotropy  $\Delta\varepsilon < 0$ , droplet aspect ratio  $\delta \approx 0.2$ ) with  $N_0 = 2.4$ .

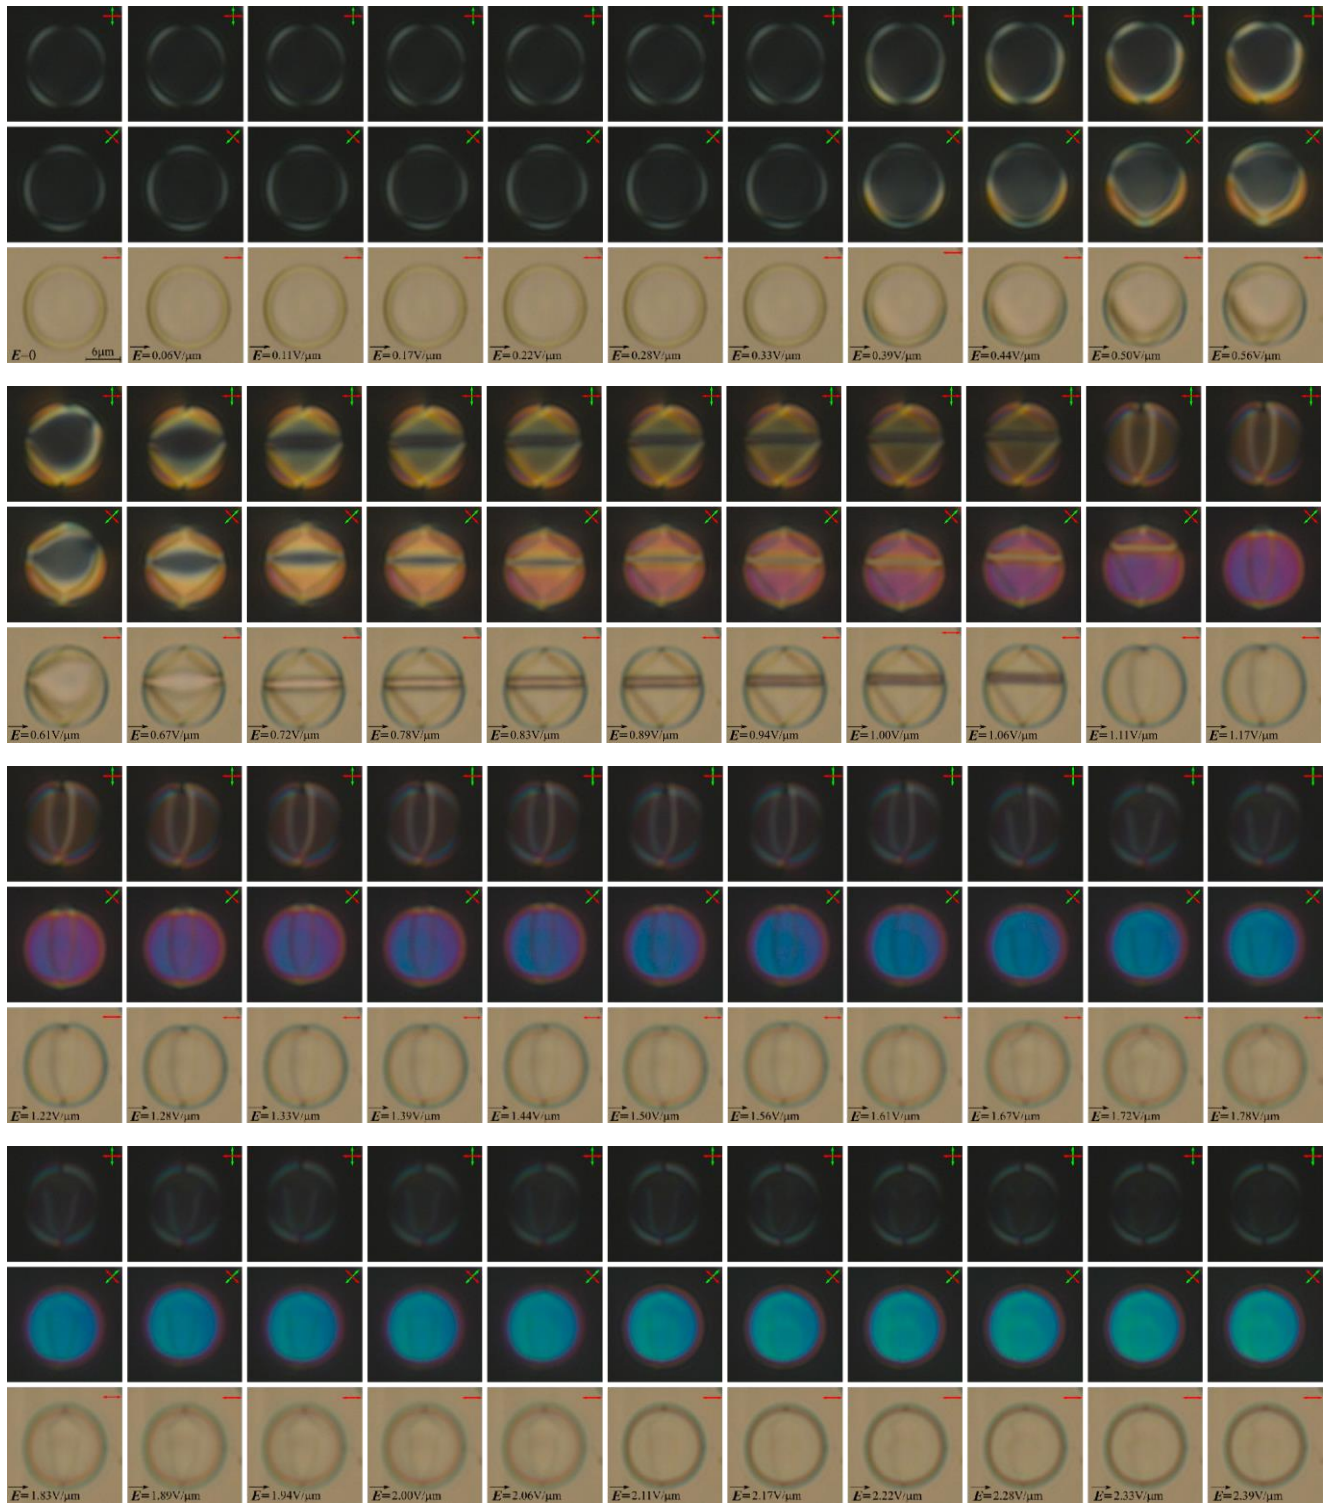

**Figure S1** – Structure transformation in the oblate cholesteric E7-based droplet (cholesteric pitch  $p_0=8.2 \mu\text{m}$ , dielectric anisotropy  $\Delta\epsilon > 0$ , droplet aspect ratio  $\delta \approx 0.2$ ) under increasing the electric field applied in IPS cell with an electrode gap of  $90 \mu\text{m}$ . The voltage was increased stepwise from 0 to  $2.39 \text{ V}/\mu\text{m}$  with in  $0.055 \text{ V}/\mu\text{m}$  and a time interval of 10-15 s.

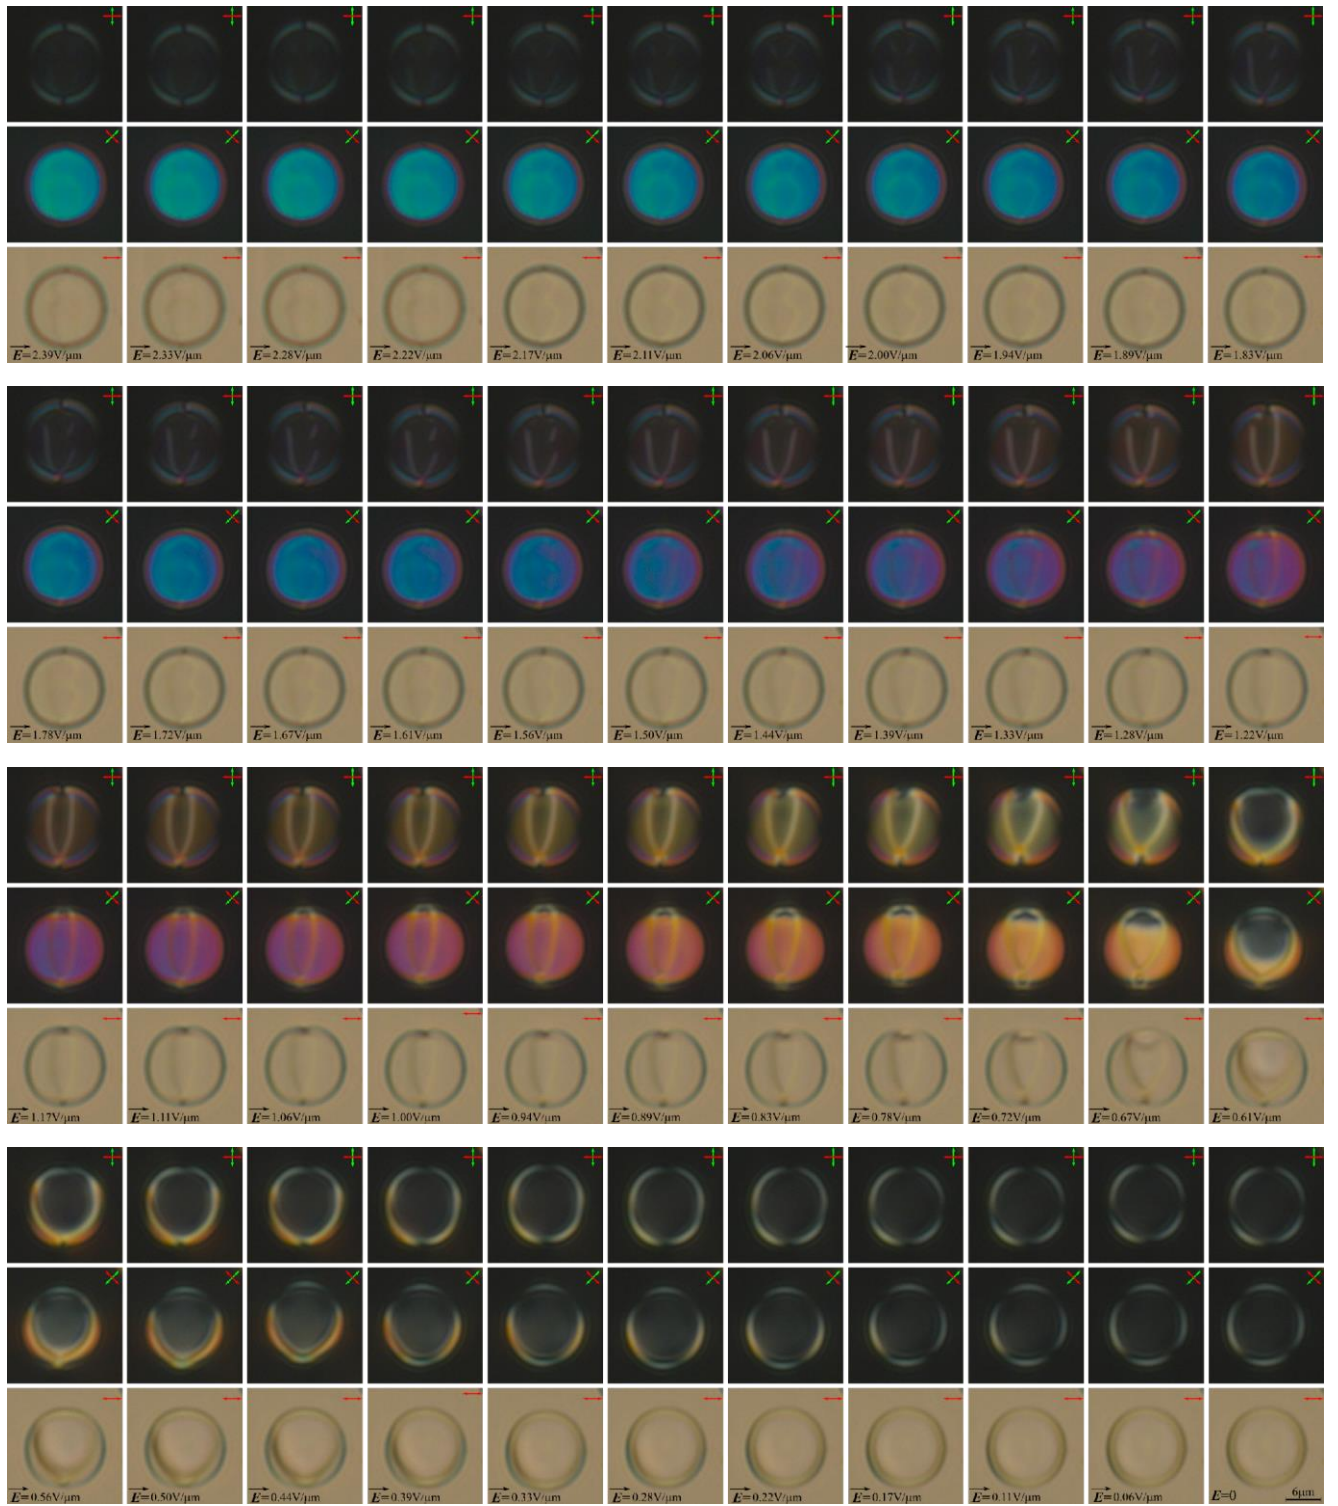

**Figure S2** – Structure transformation in the oblate cholesteric E7-based droplet ( $p_0=8.2\ \mu\text{m}$ ,  $\Delta\varepsilon > 0$ ,  $\delta \approx 0.2$ ) under decreasing the electric field applied in IPS cell with an electrode gap of  $90\ \mu\text{m}$ . The voltage was decreased stepwise from 2.39 to 0  $\text{V}/\mu\text{m}$  in  $0.055\text{V}/\mu\text{m}$  and a time interval of 10-15 s.

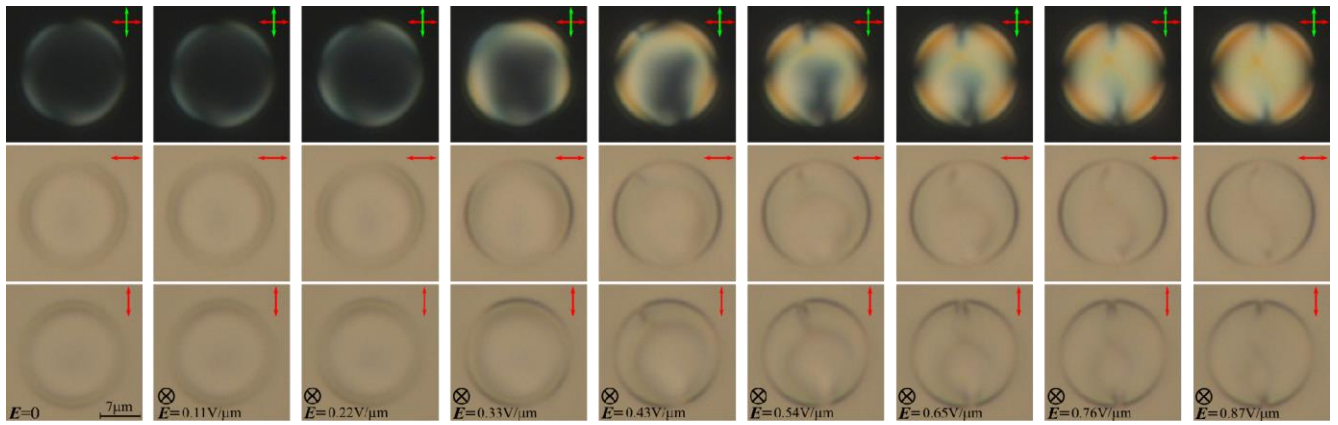

**Figure S3** – Structure transformation in the oblate cholesteric CYLC-45-based droplet (cholesteric pitch  $p_0=16.0\ \mu\text{m}$ , dielectric anisotropy  $\Delta\varepsilon < 0$ , droplet aspect ratio  $\delta \approx 0.2$ ) under increasing the electric field applied in the sandwich cell (gap  $4.6\ \mu\text{m}$ ). The voltage was increased stepwise from 0 to  $0.87\ \text{V}/\mu\text{m}$  in  $0.108\ \text{V}/\mu\text{m}$  and a time interval of 10-15 s.

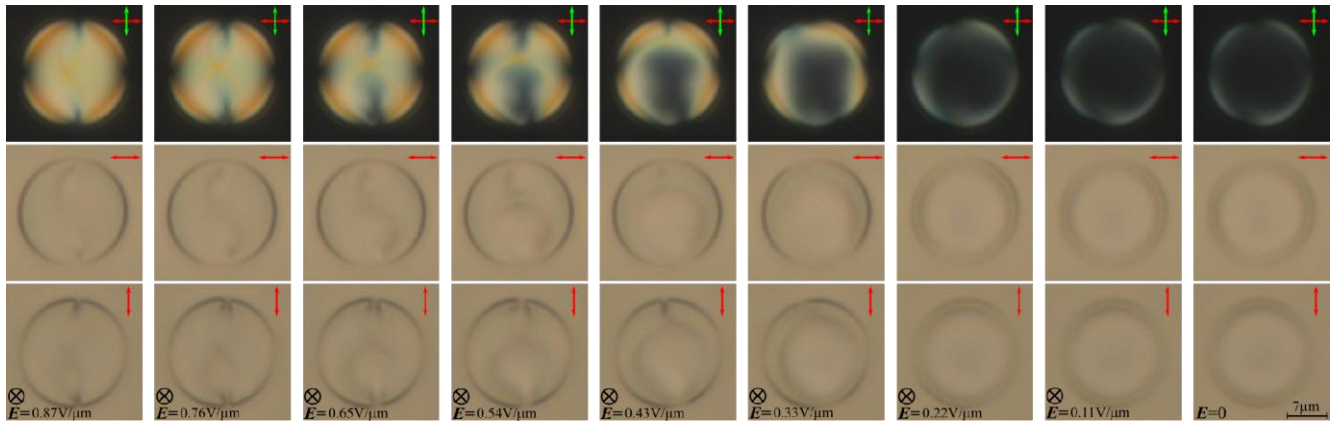

**Figure S4** – Structure transformation in the oblate cholesteric CYLC-45-based droplet ( $p_0=16.0\ \mu\text{m}$ ,  $\Delta\varepsilon < 0$ ,  $\delta \approx 0.2$ ) under decreasing the electric field applied in the sandwich cell (gap  $4.6\ \mu\text{m}$ ). The voltage was decreased stepwise from  $0.87\ \text{V}/\mu\text{m}$  to  $0\ \text{V}/\mu\text{m}$  in  $0.108\ \text{V}/\mu\text{m}$  and a time interval of 10-15 s.
